# Supplementary material for: Genome-wide methylation data improves dissection of the effect of smoking on body mass index
Source: PubMed Central journal article supplement (PMC8428545; doi:10.1371/journal.pgen.1009750), 2021-09-09

# Height

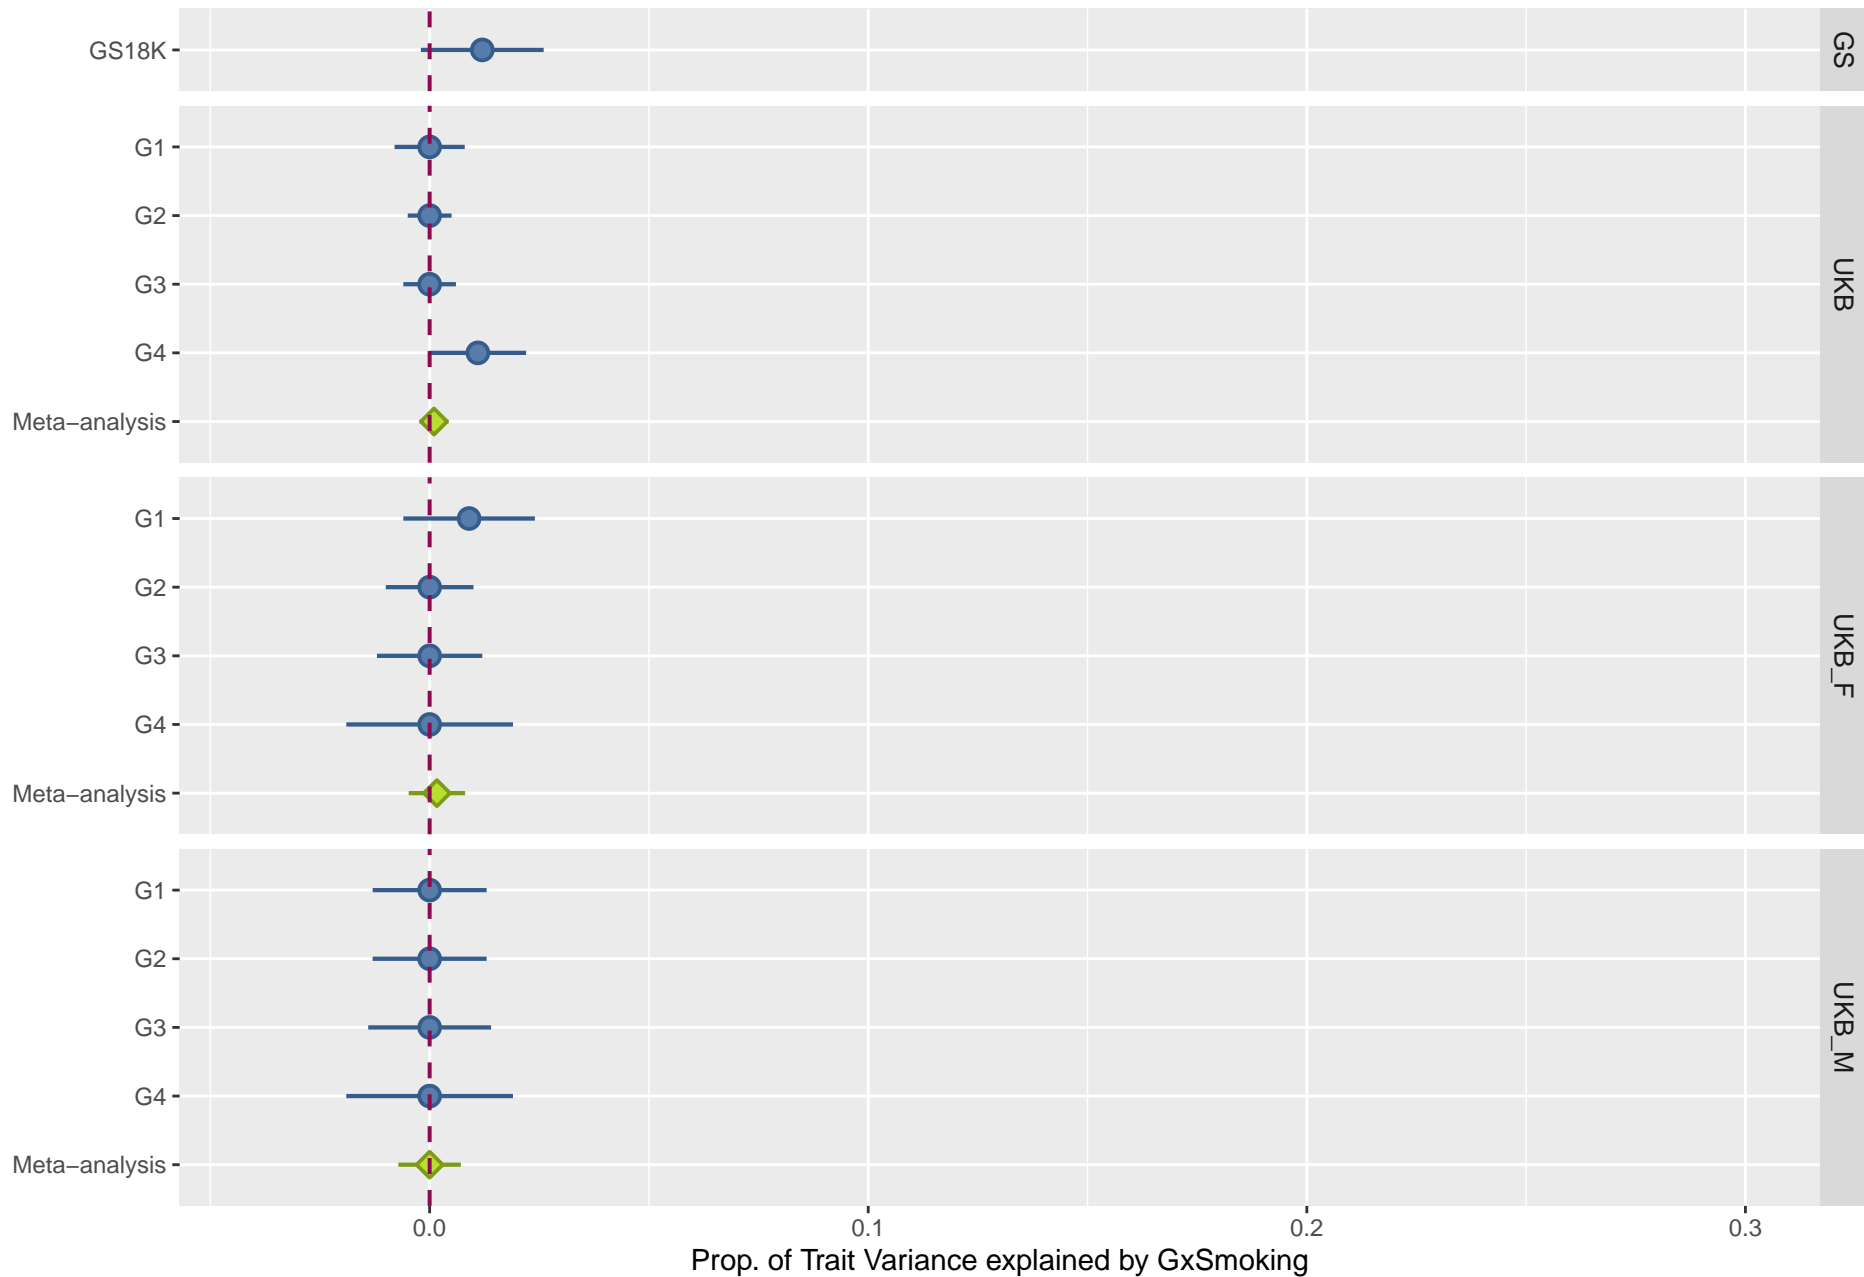

# Weight

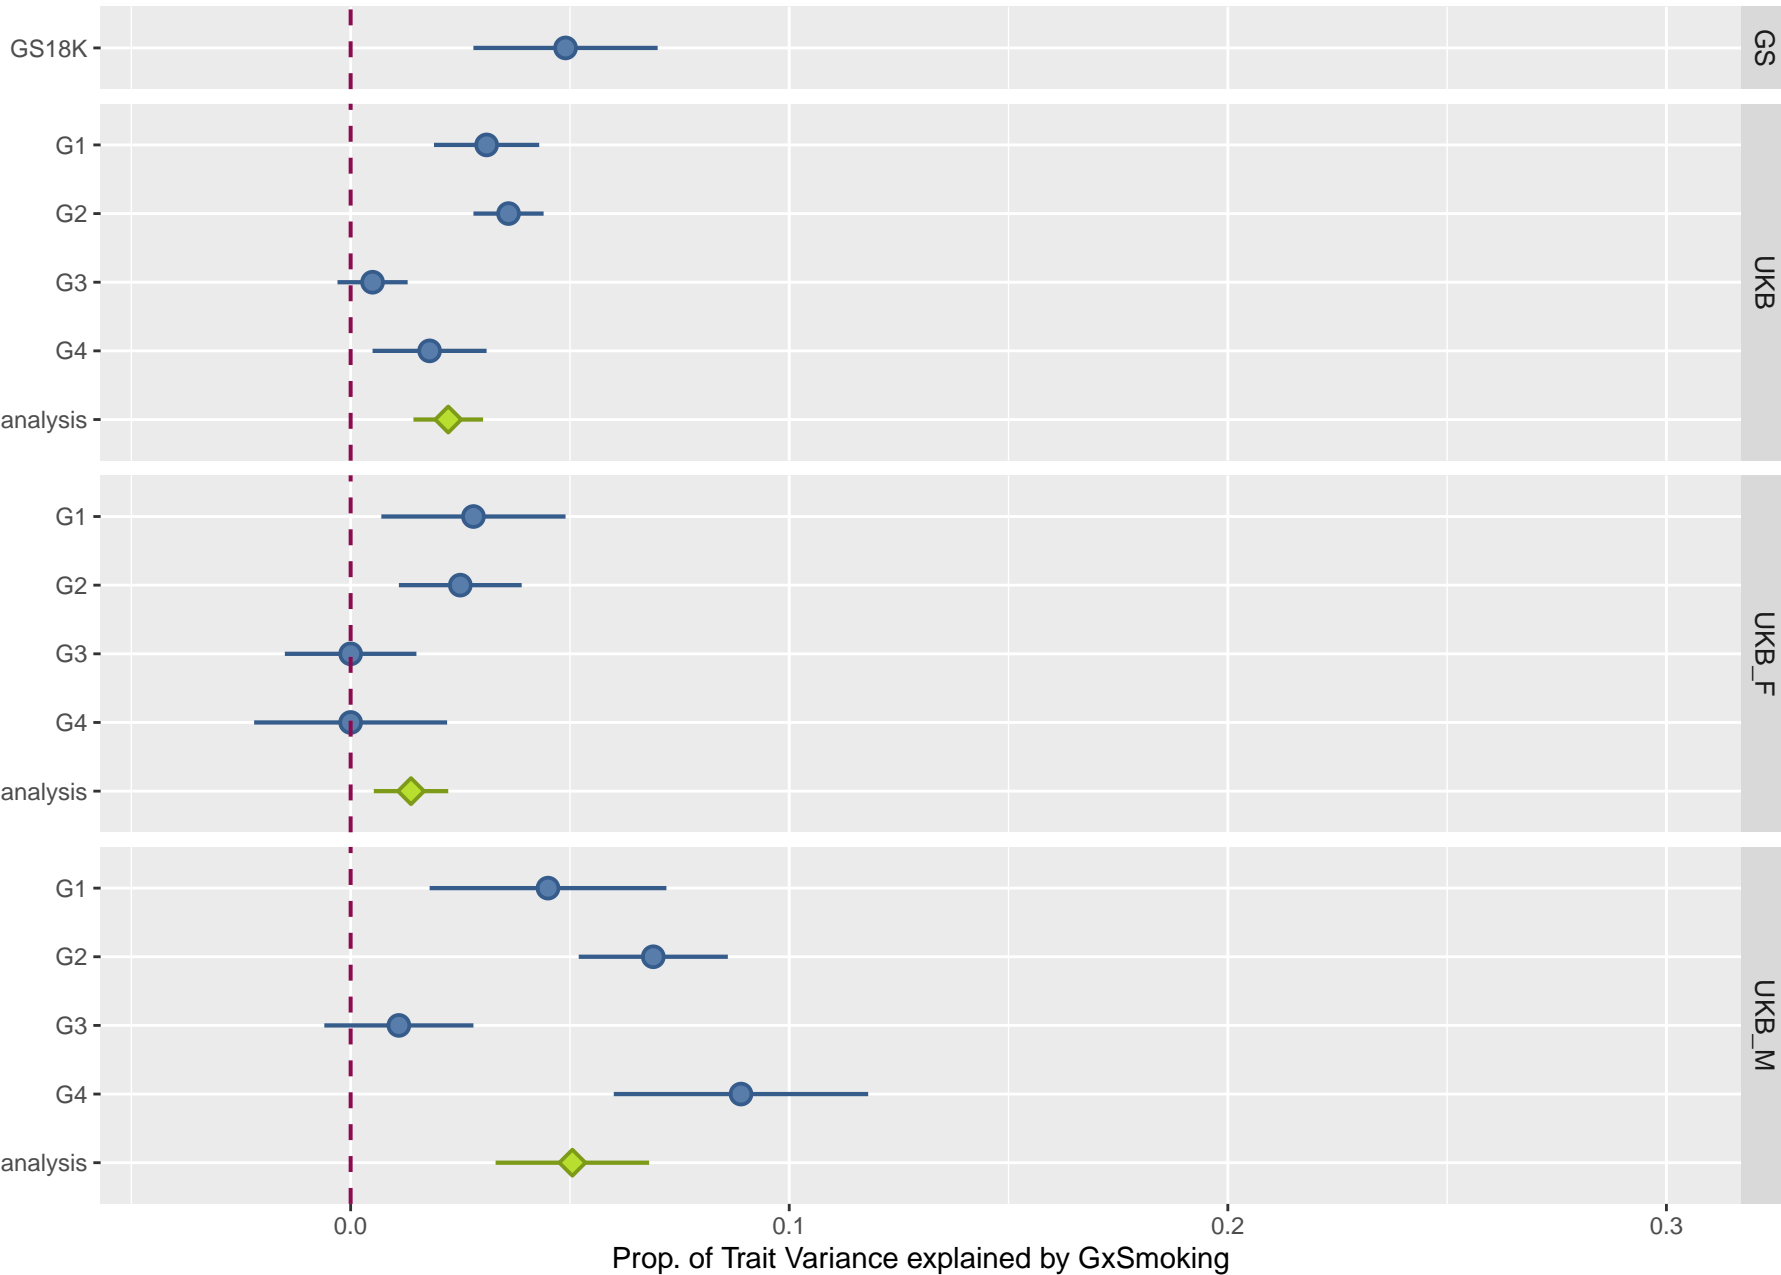

# BMI

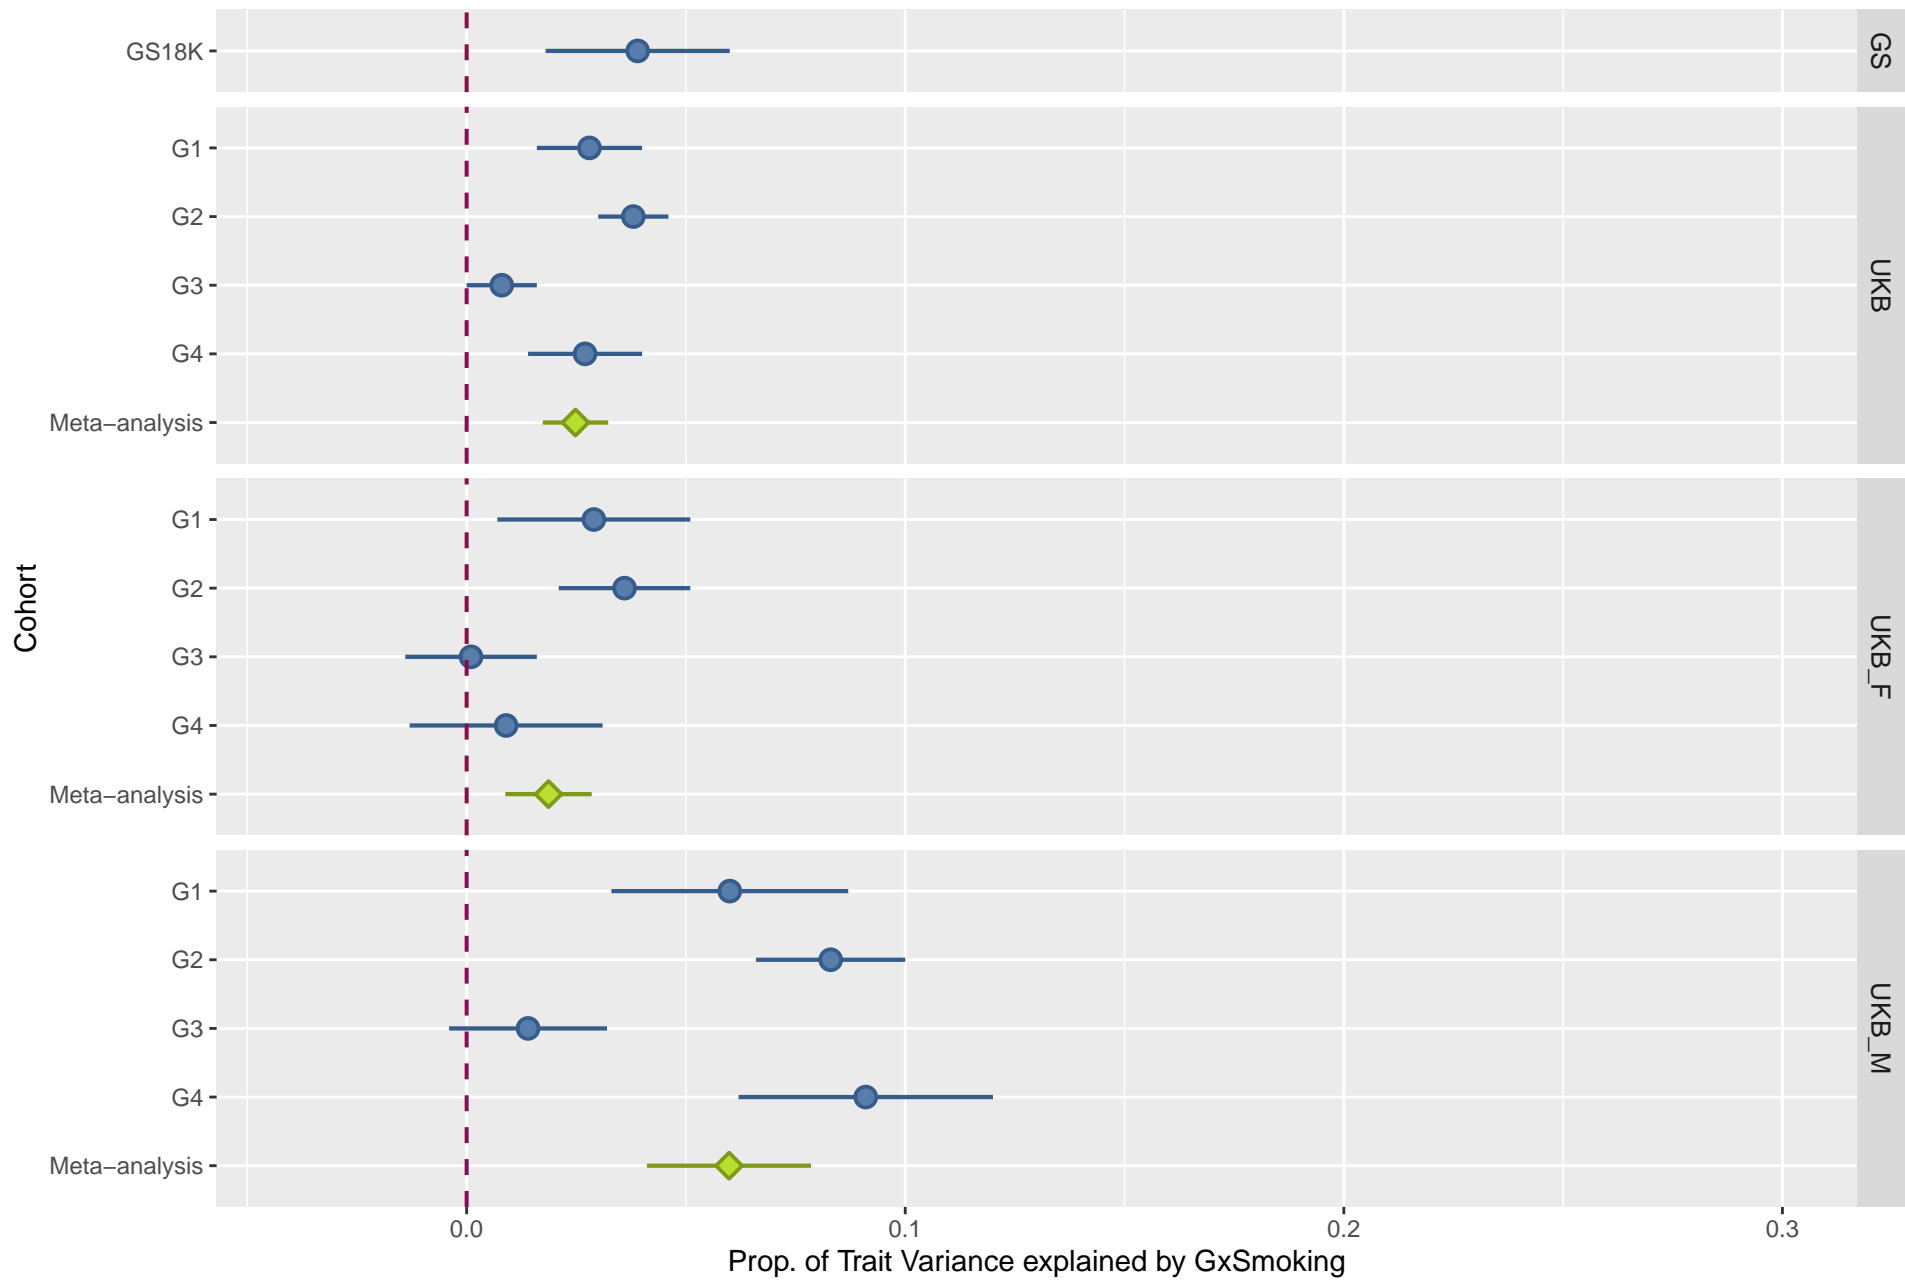

# Waist

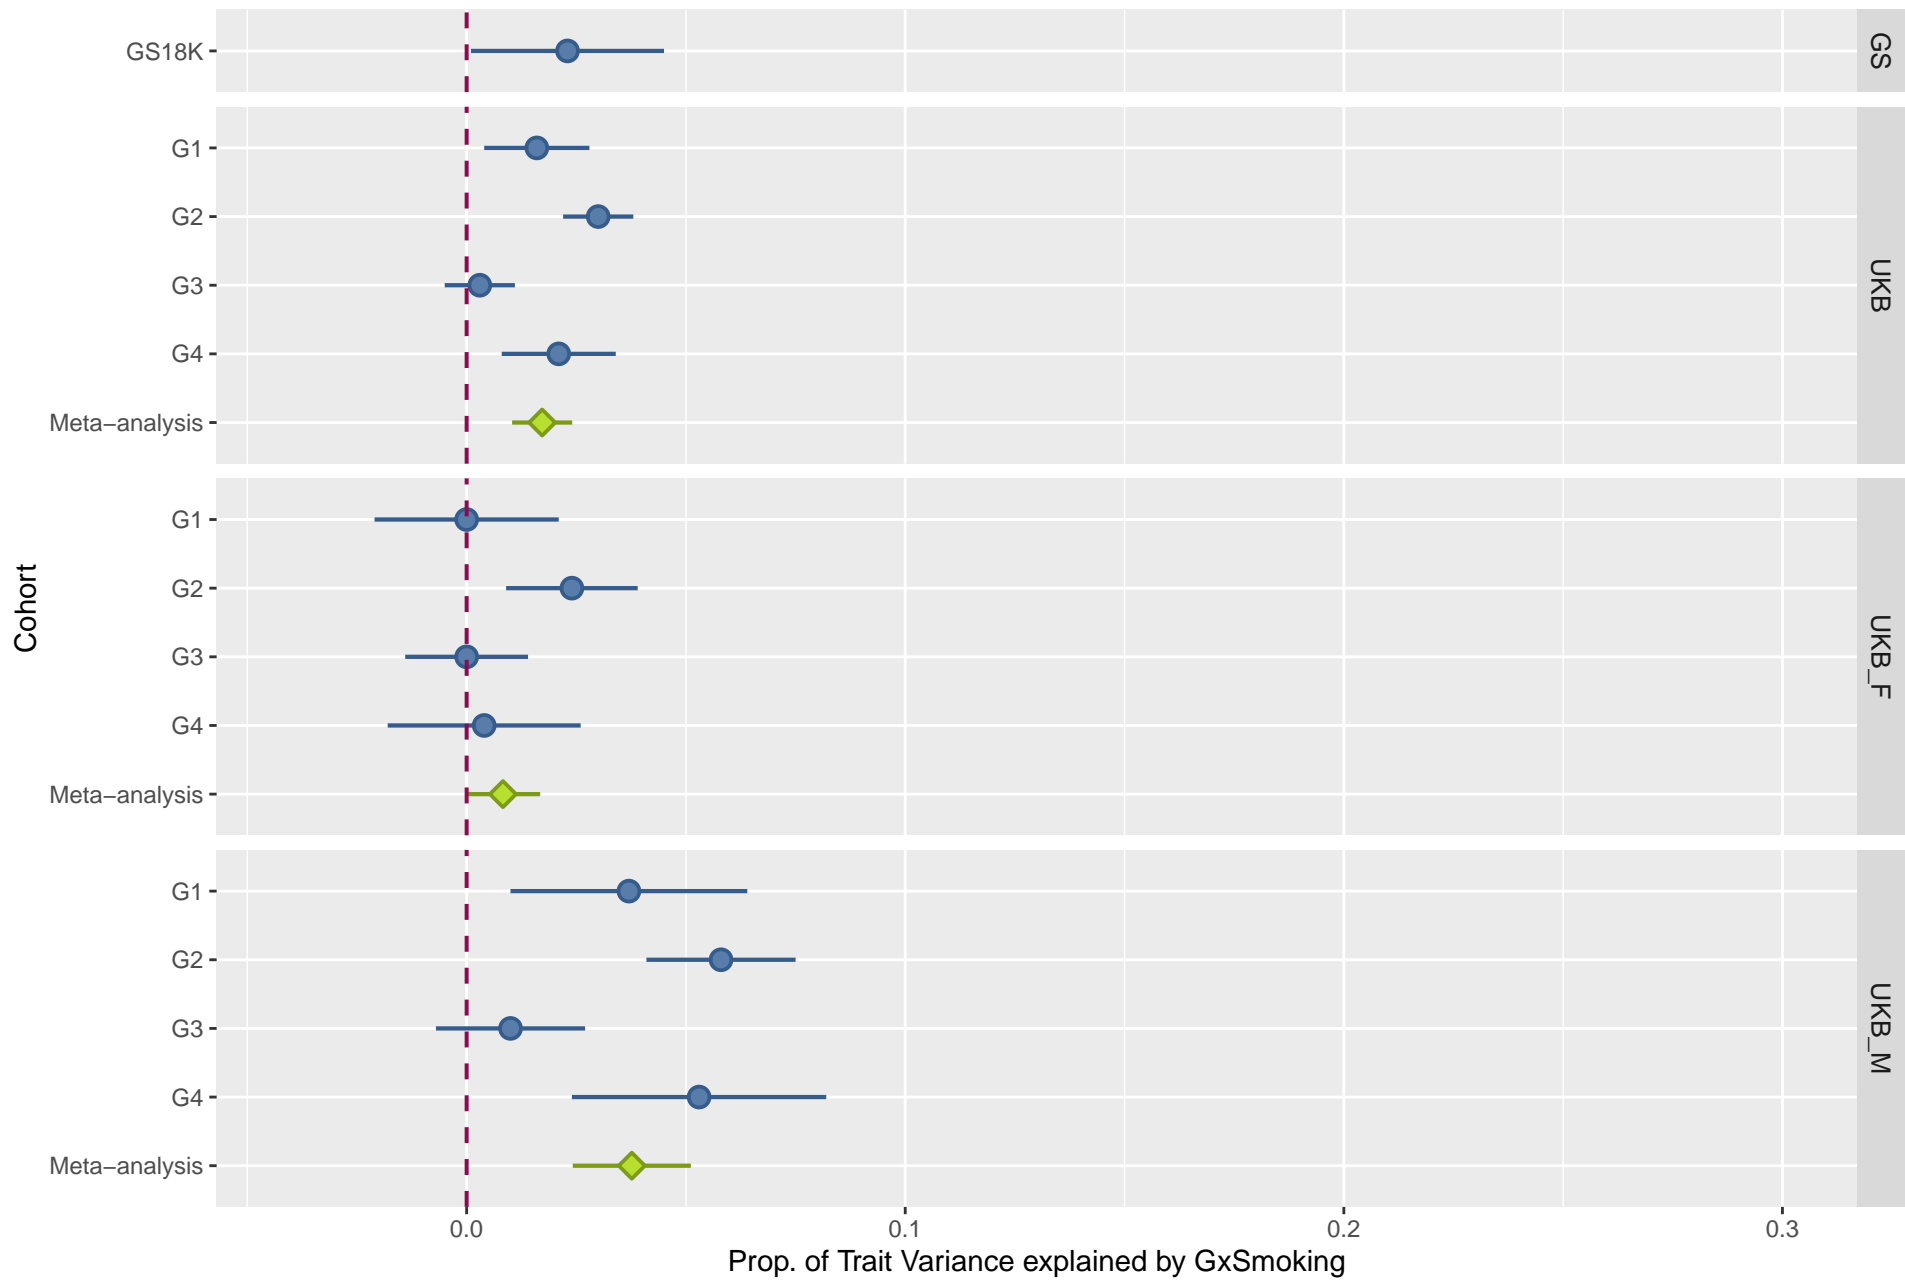

# Hips

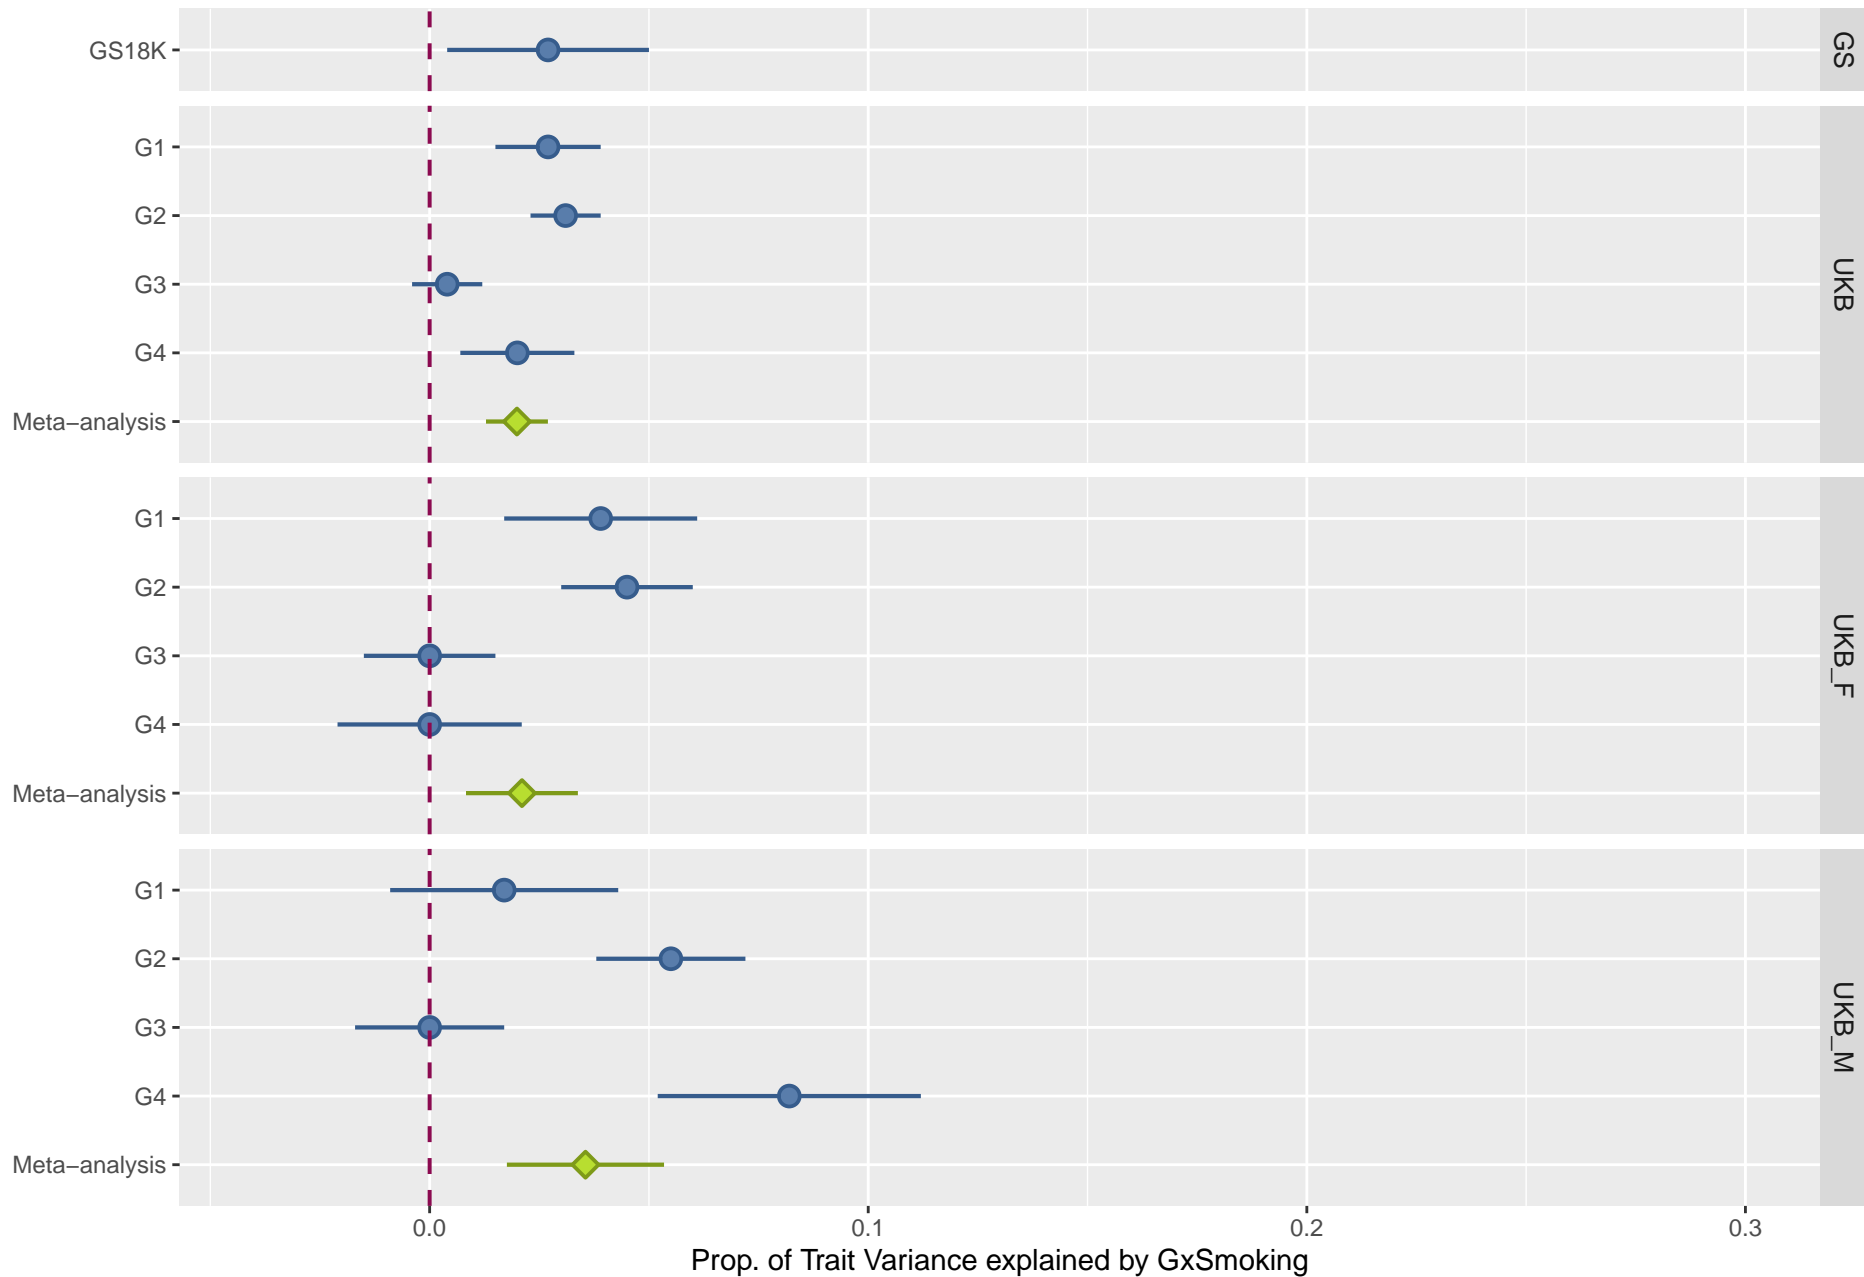

# WHR

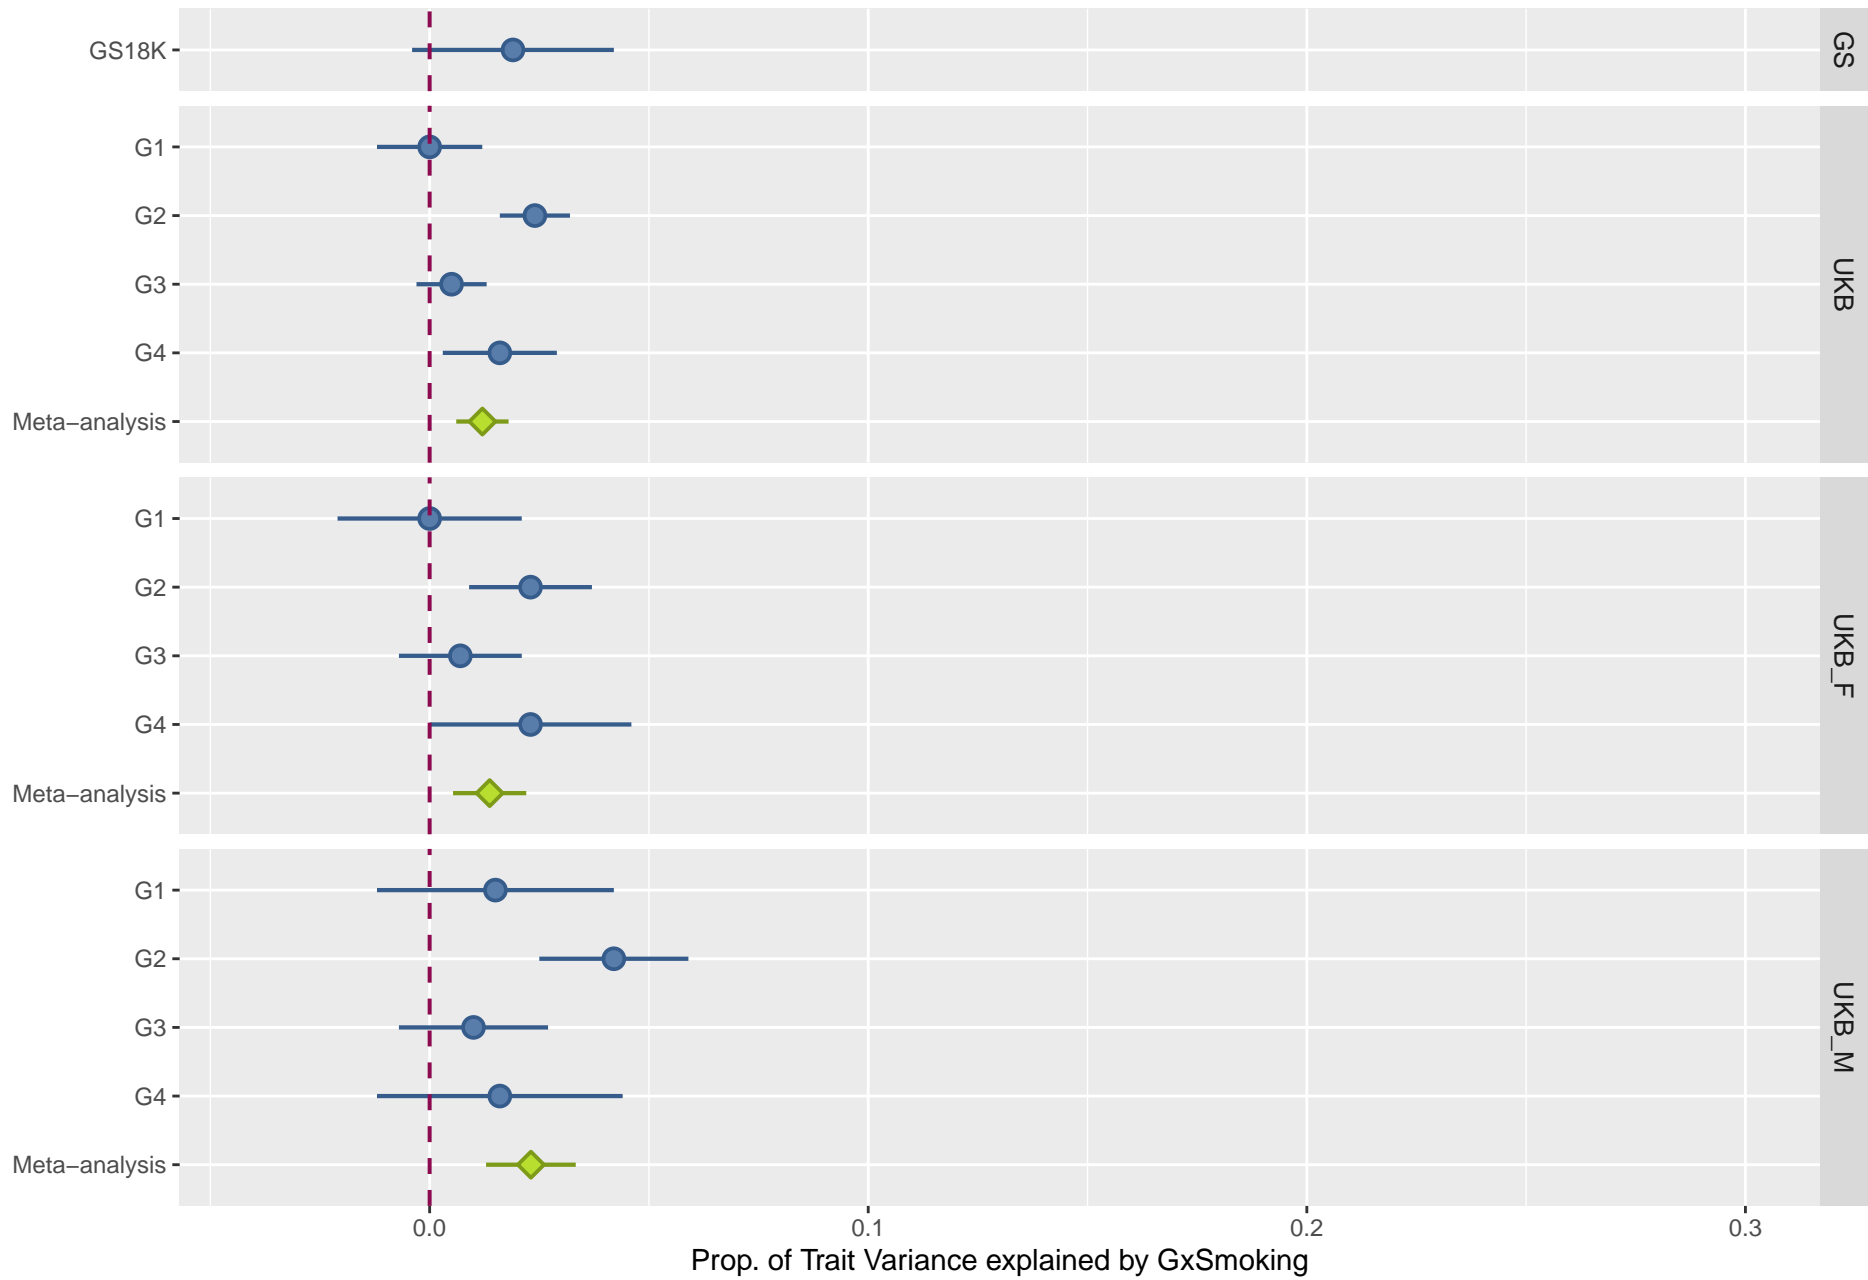

# Fat Percentage

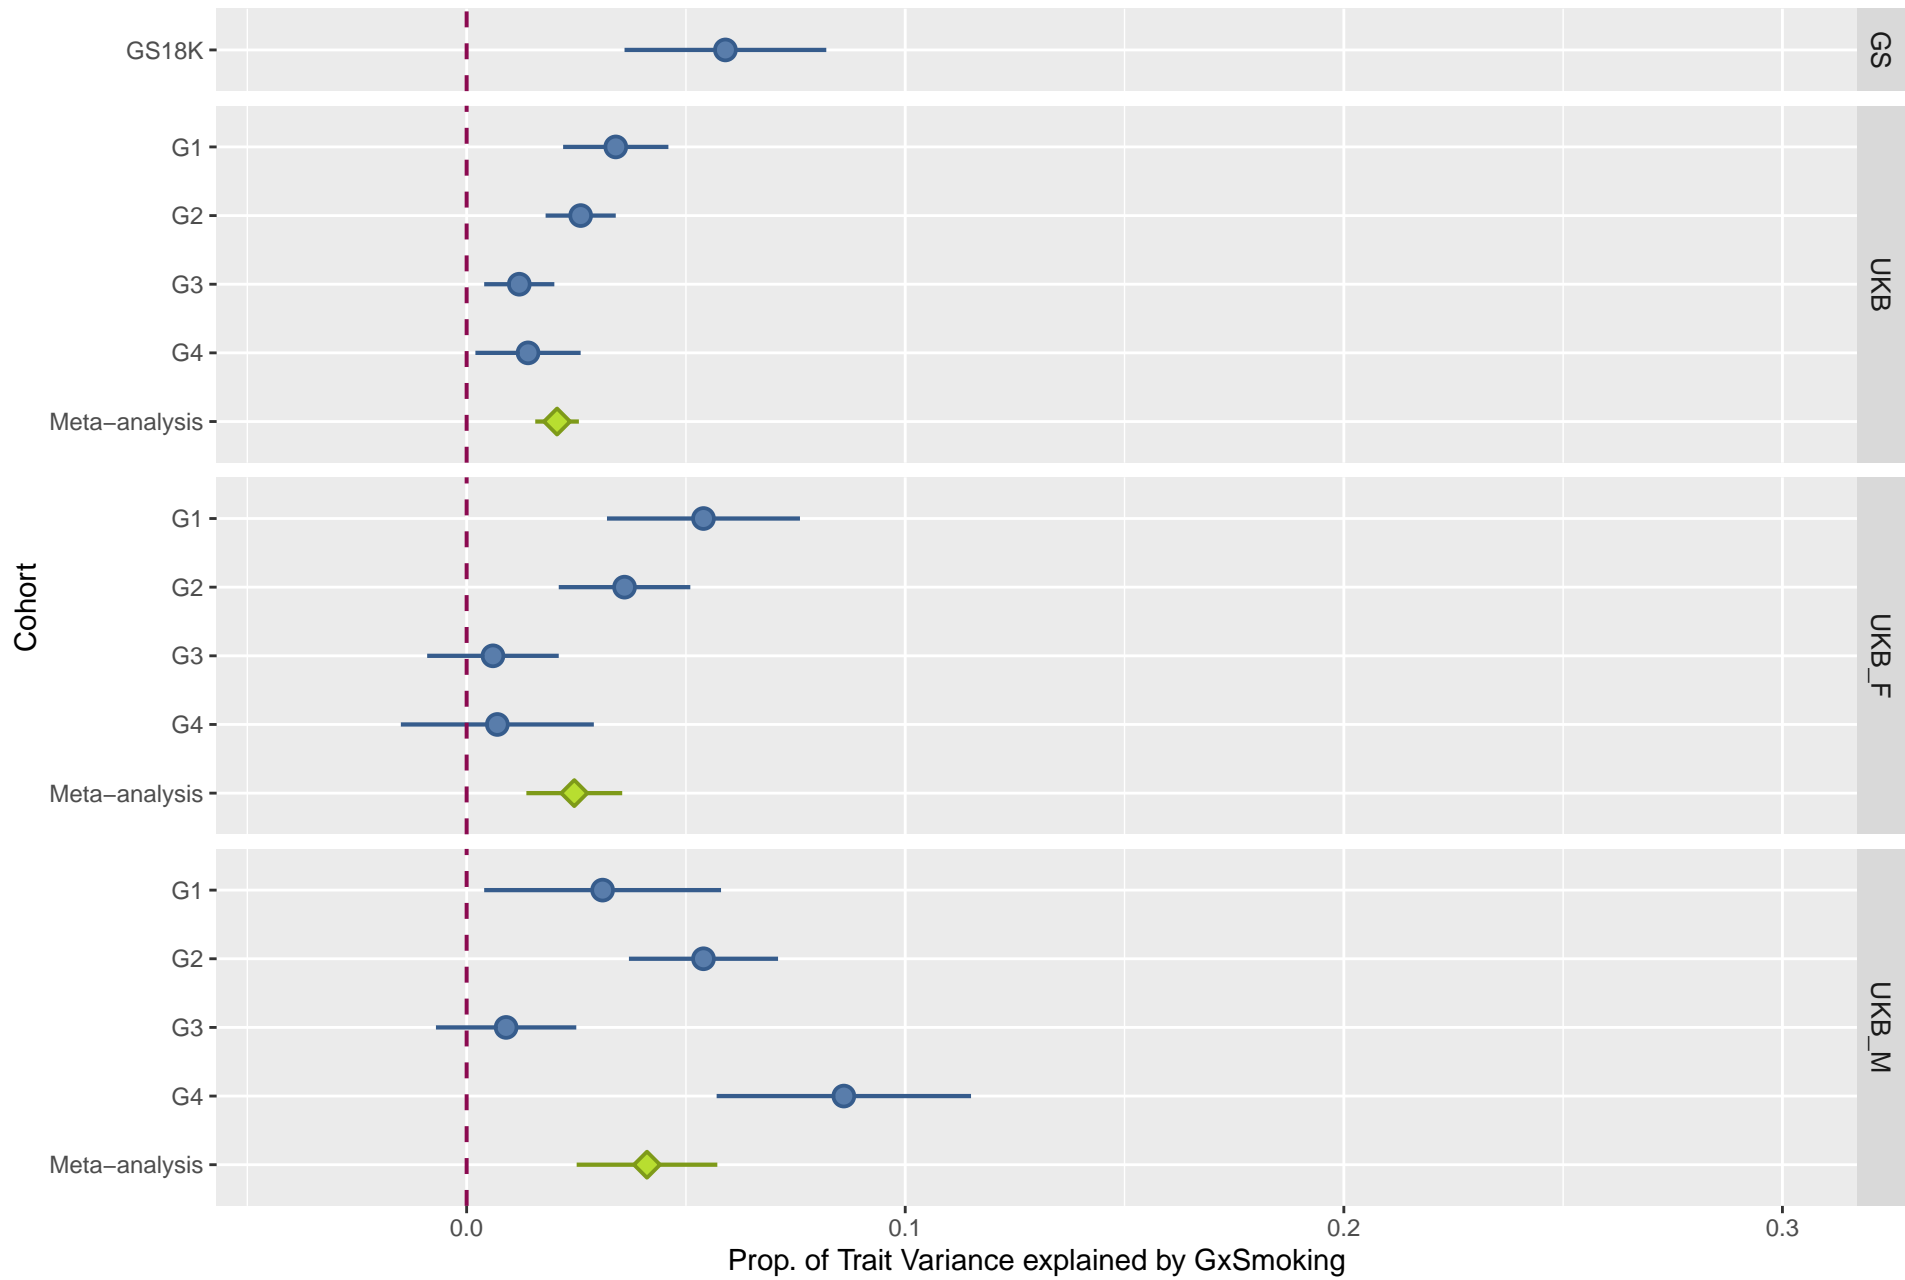

Supplement: pgen.1009750.s002.pdf [file pgen.1009750.s002.pdf]
