# Supplementary material for: Genome-wide methylation data improves dissection of the effect of smoking on body mass index
Source: PLOS journal article supplement (doi:10.1371/journal.pgen.1009750), 2021-09-09

# Height

Cohort

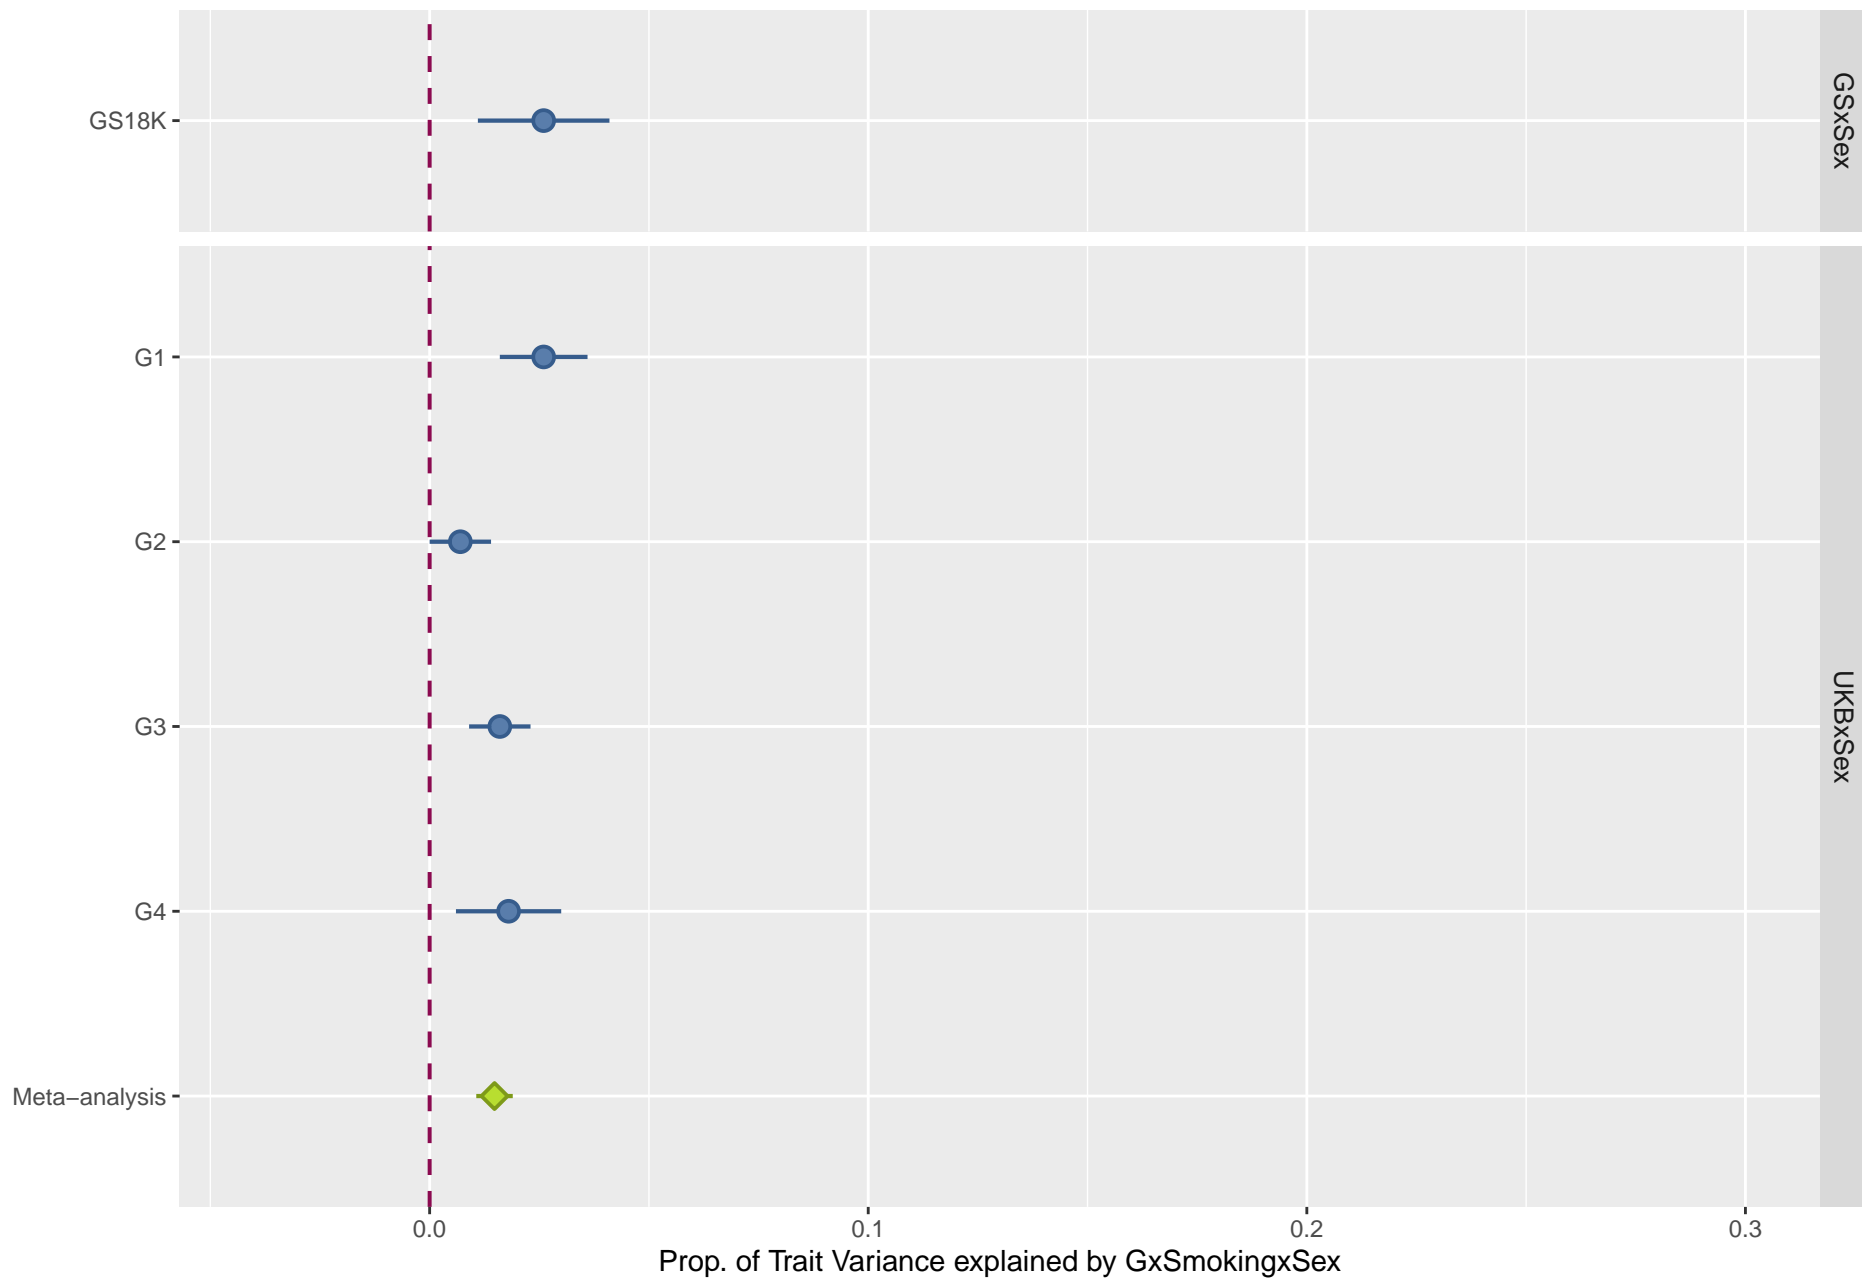

Weight

Cohort

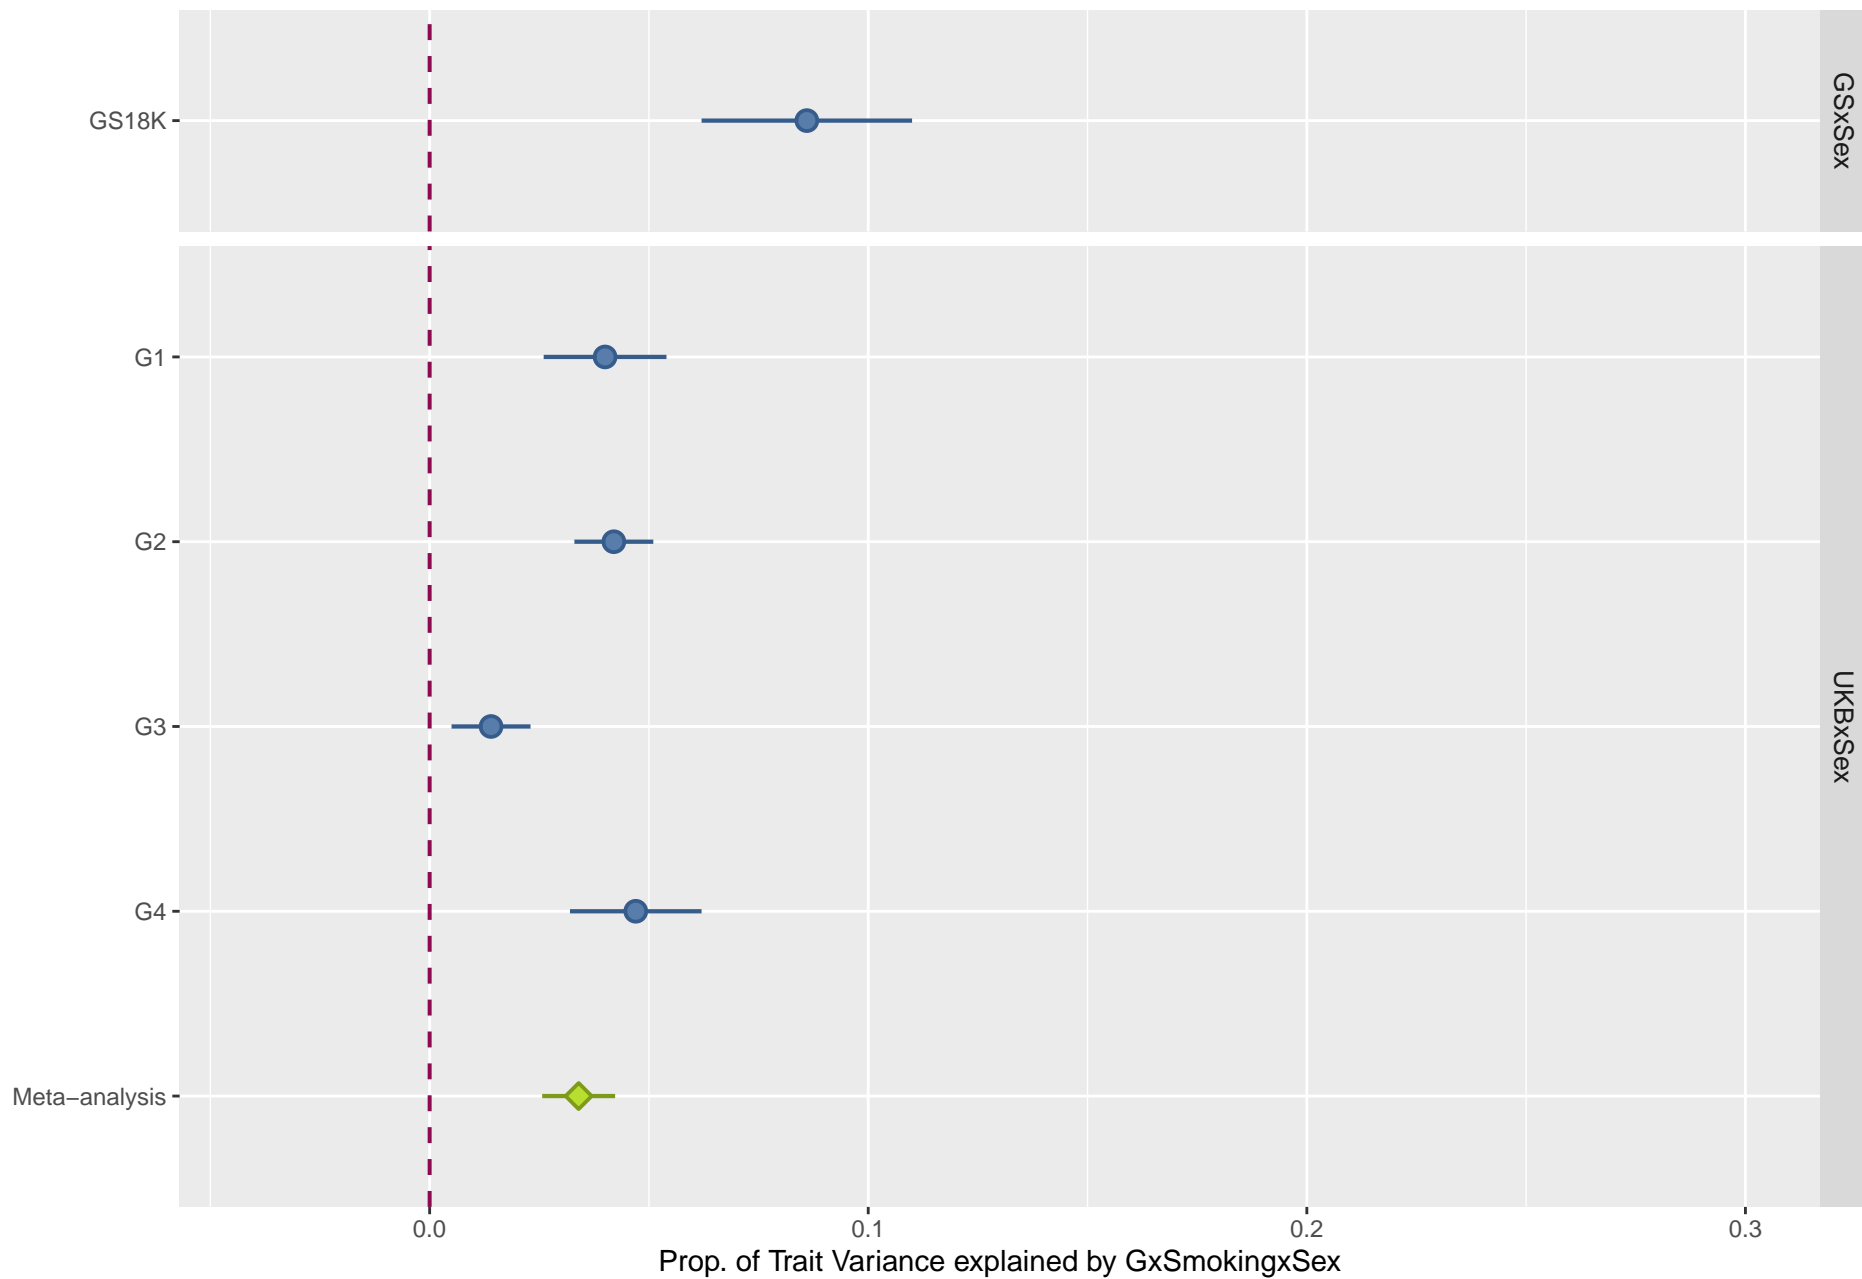

# BMI

Cohort

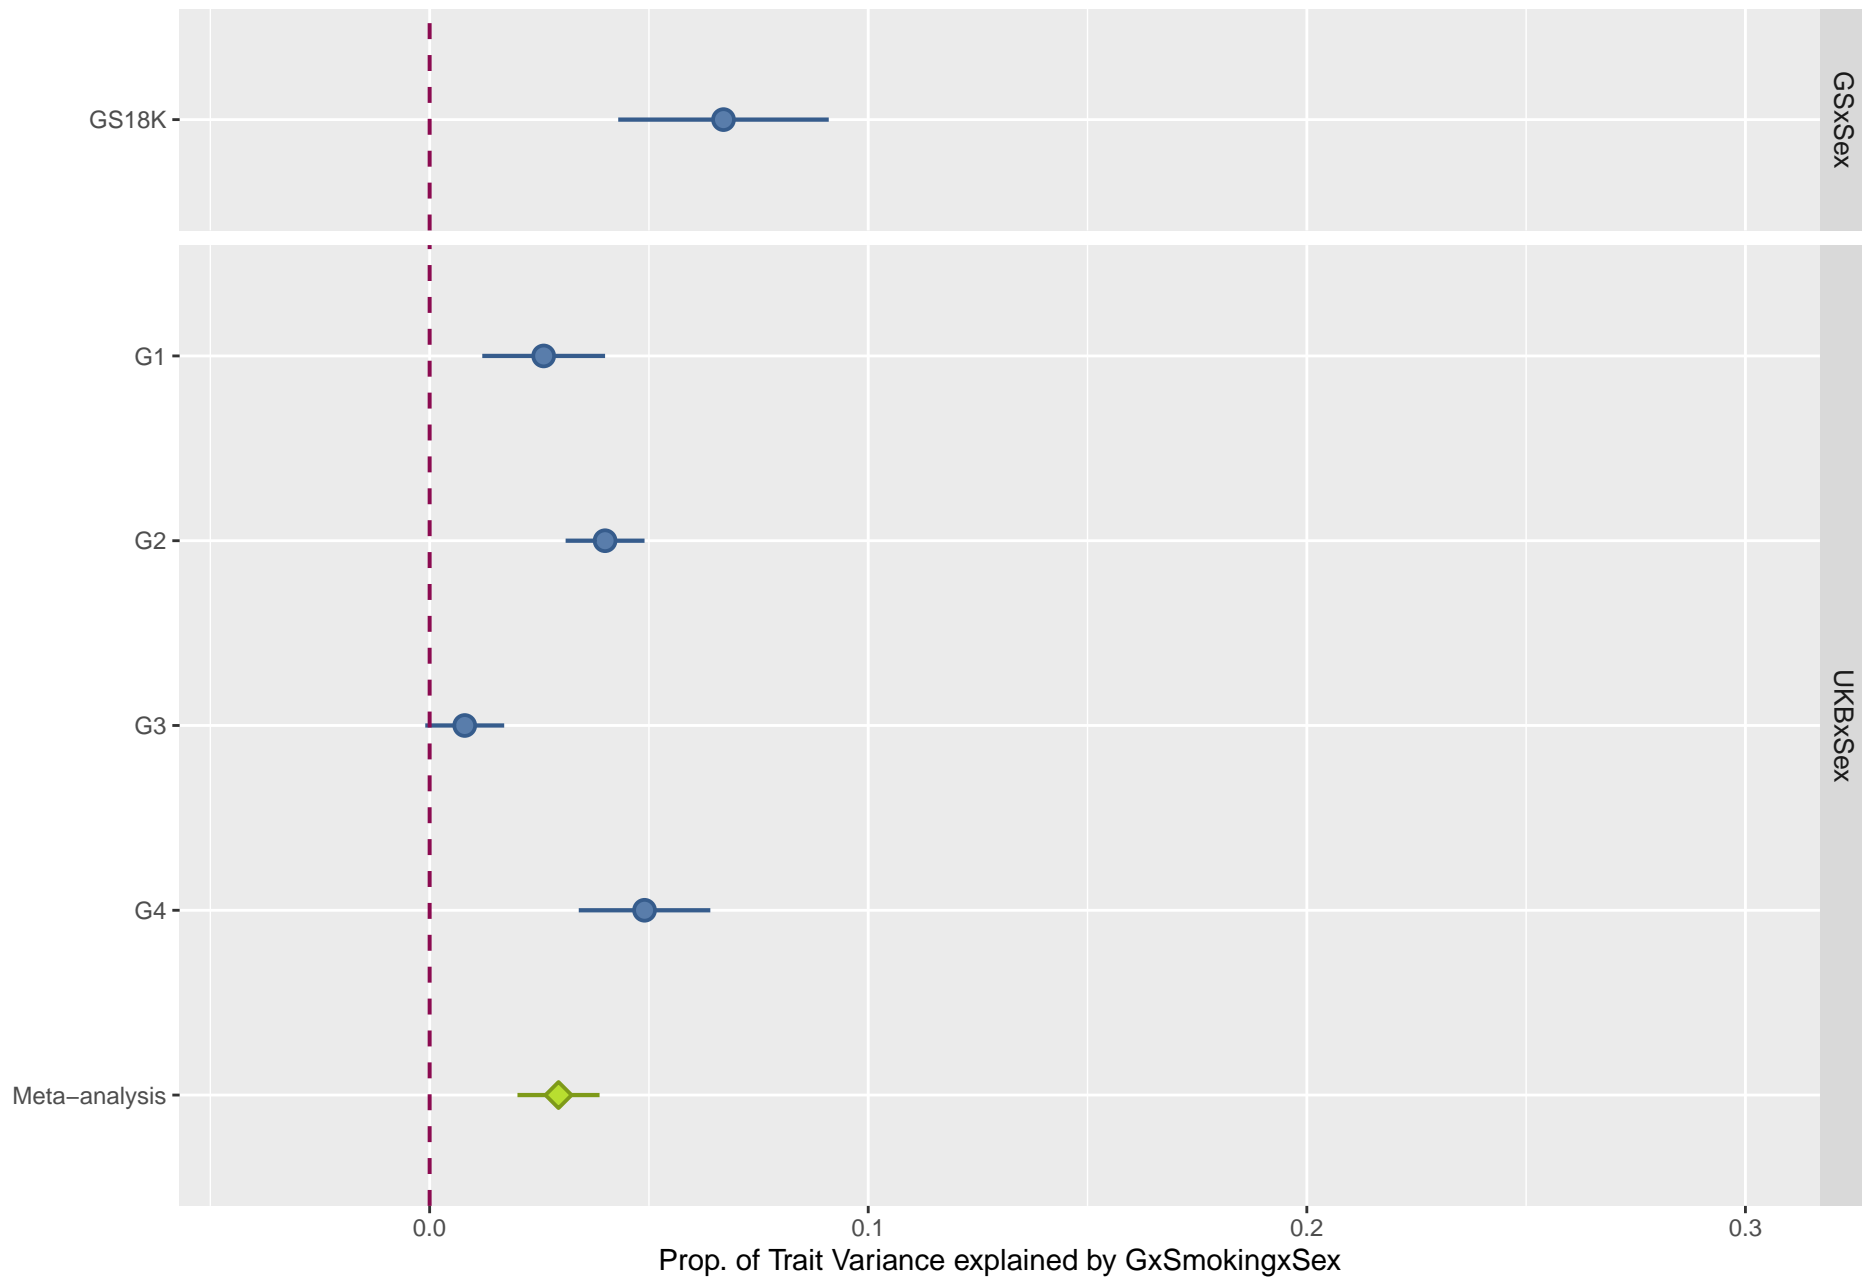

# Waist

Cohort

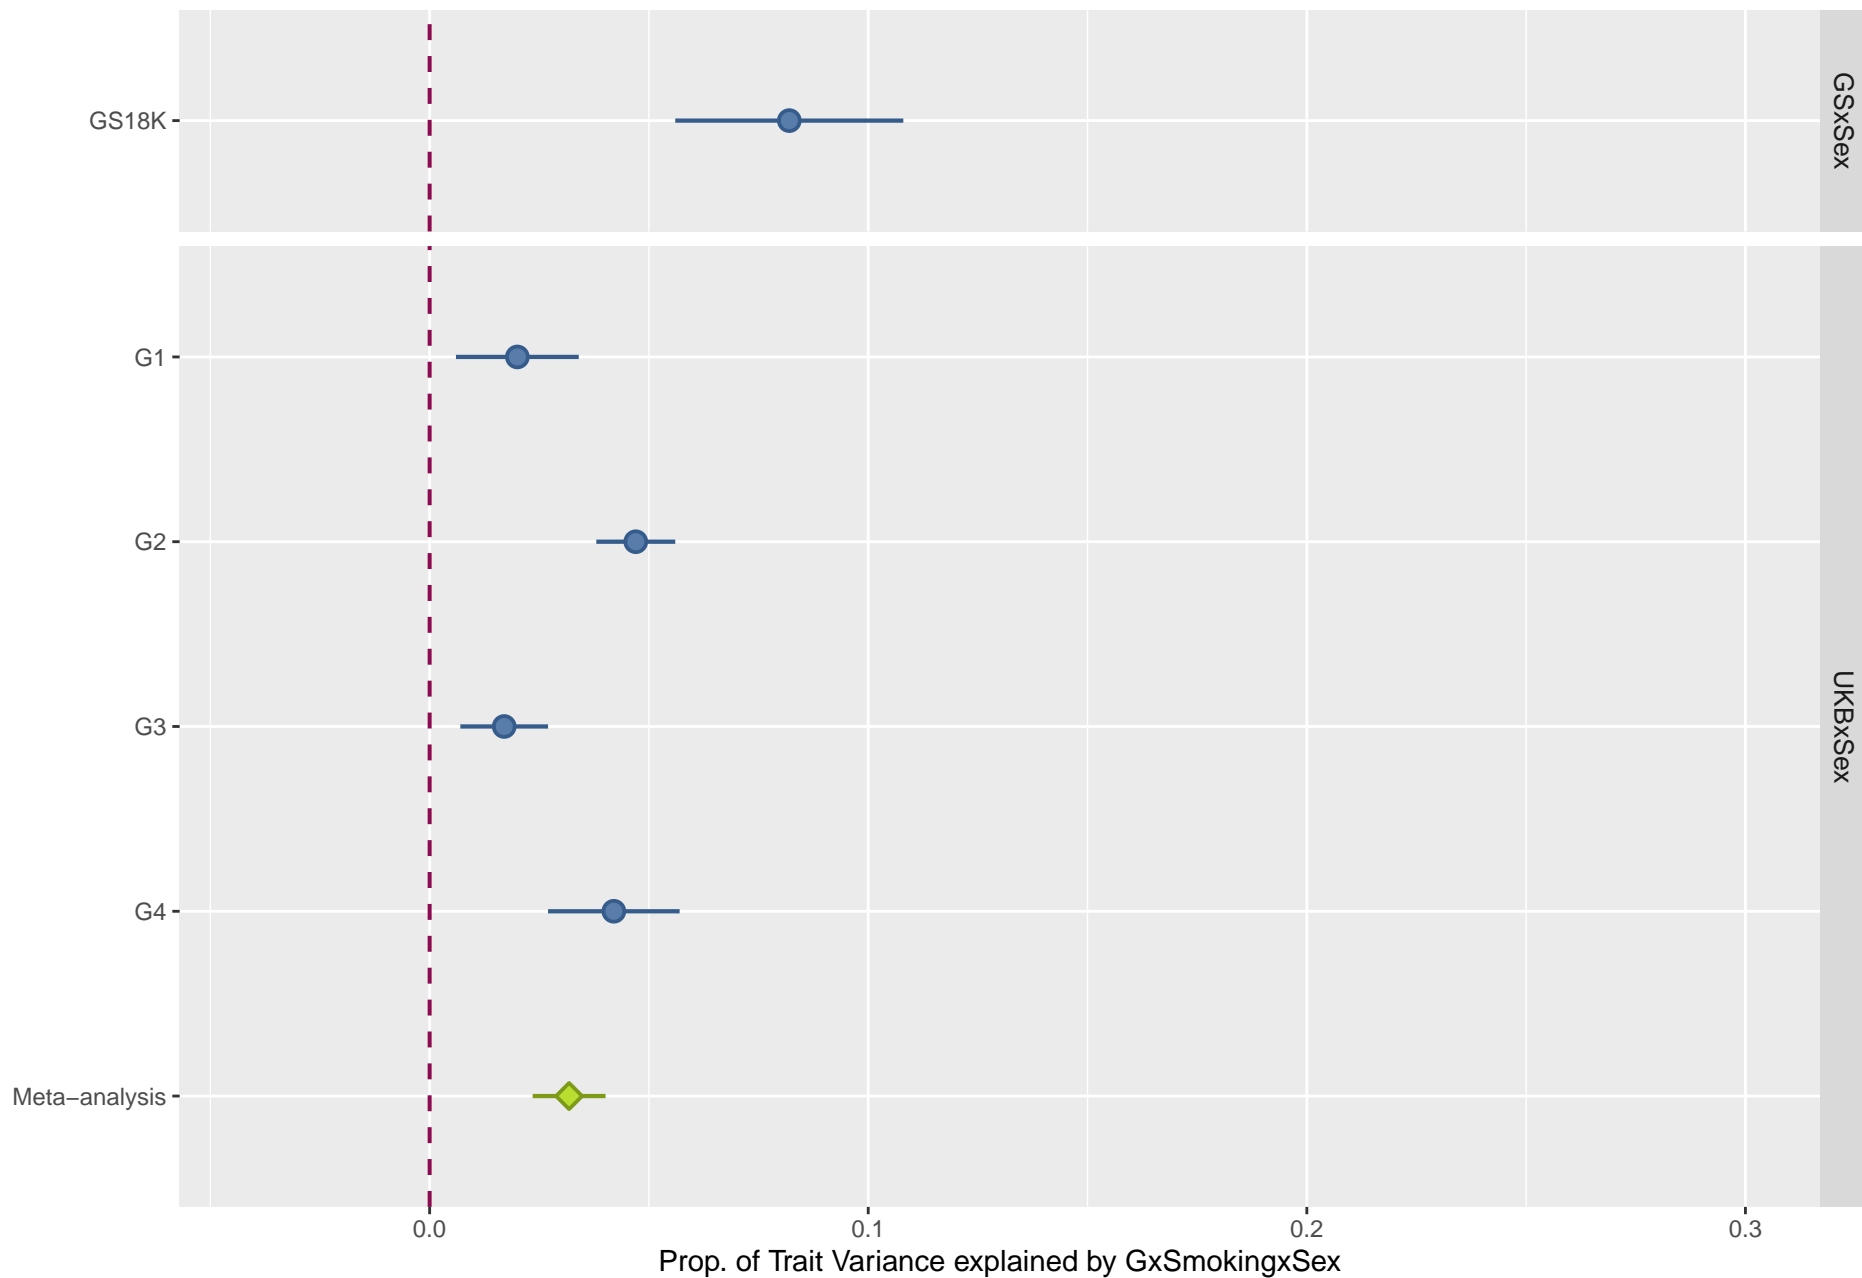

# Hips

Cohort

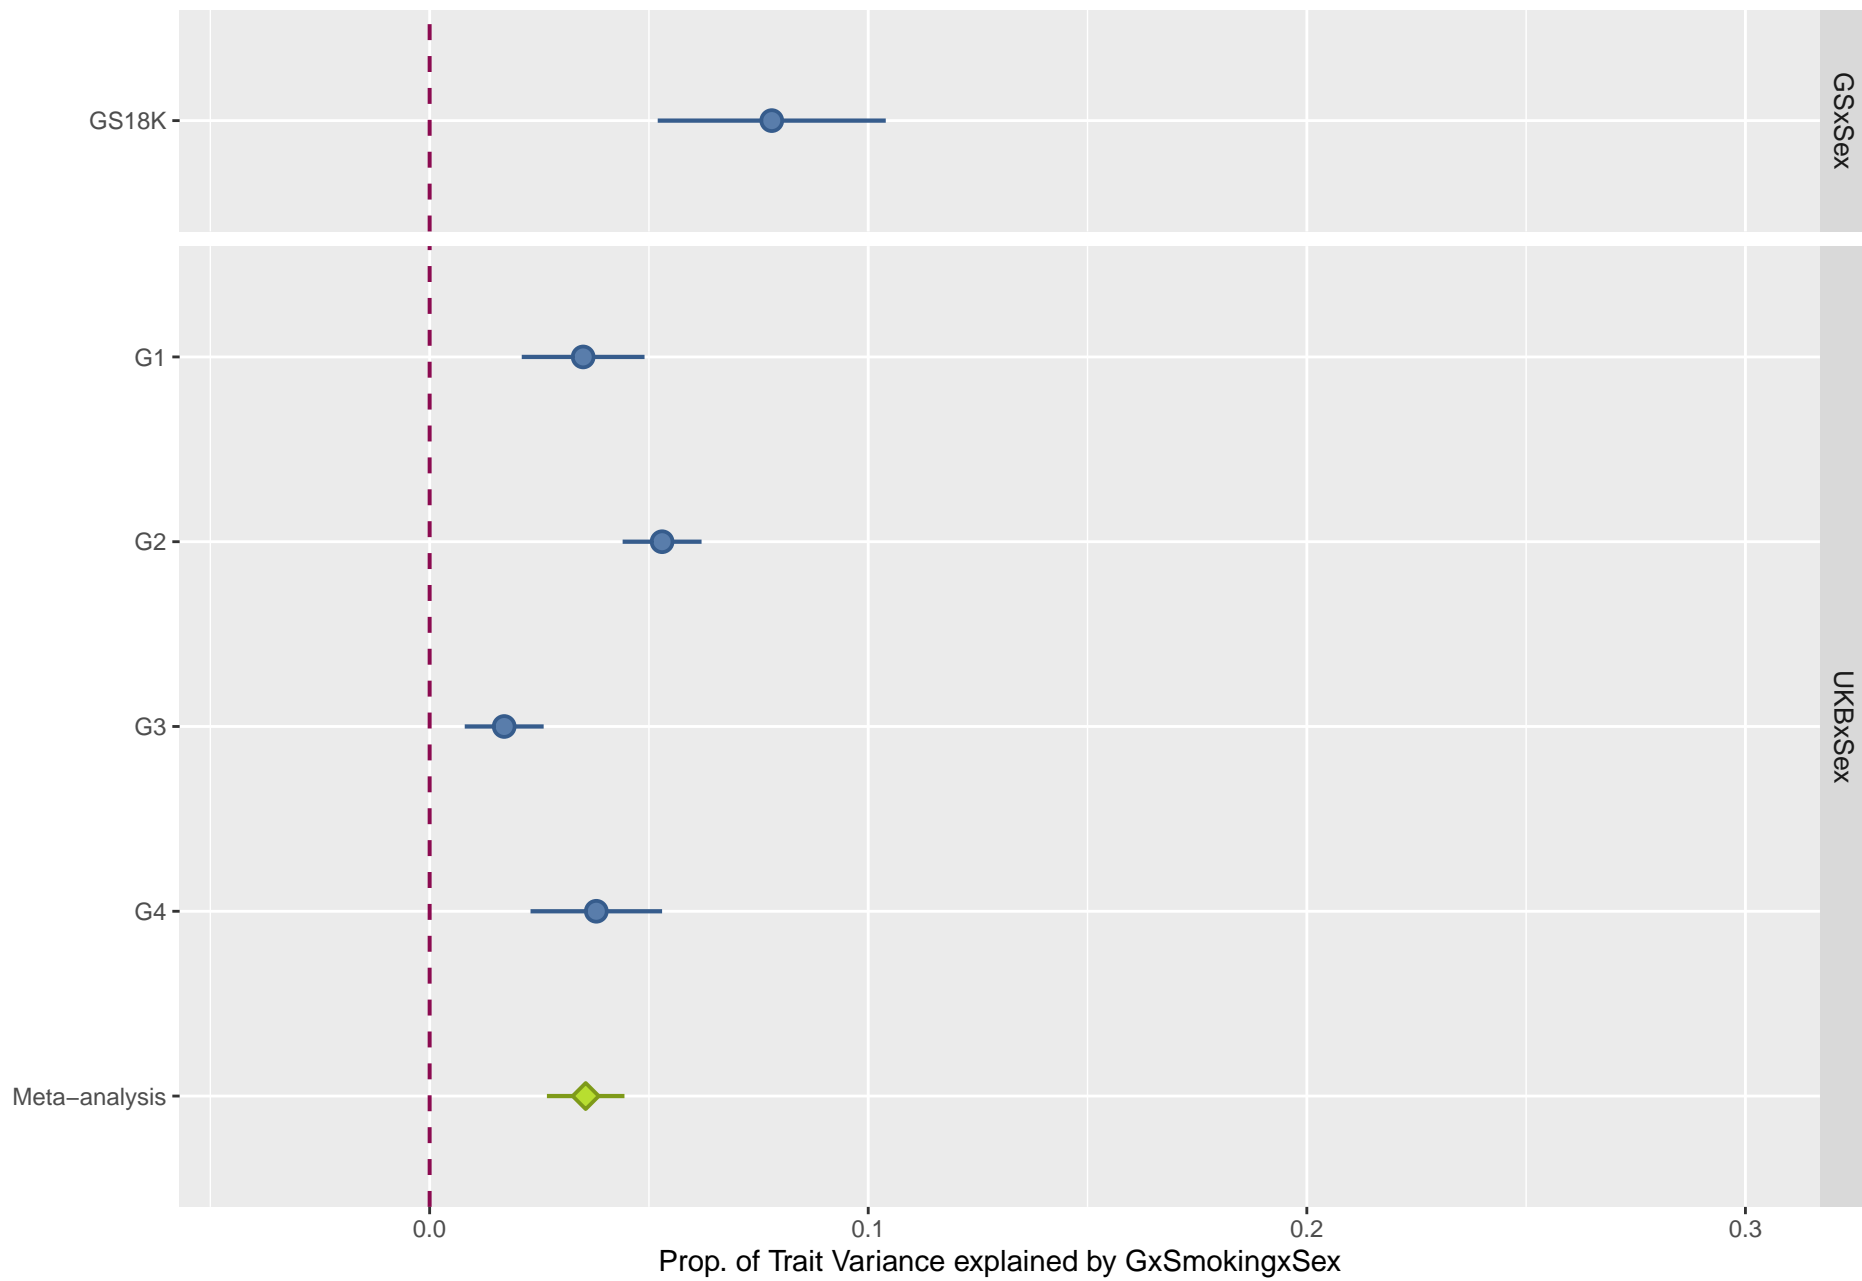

WHR

Cohort

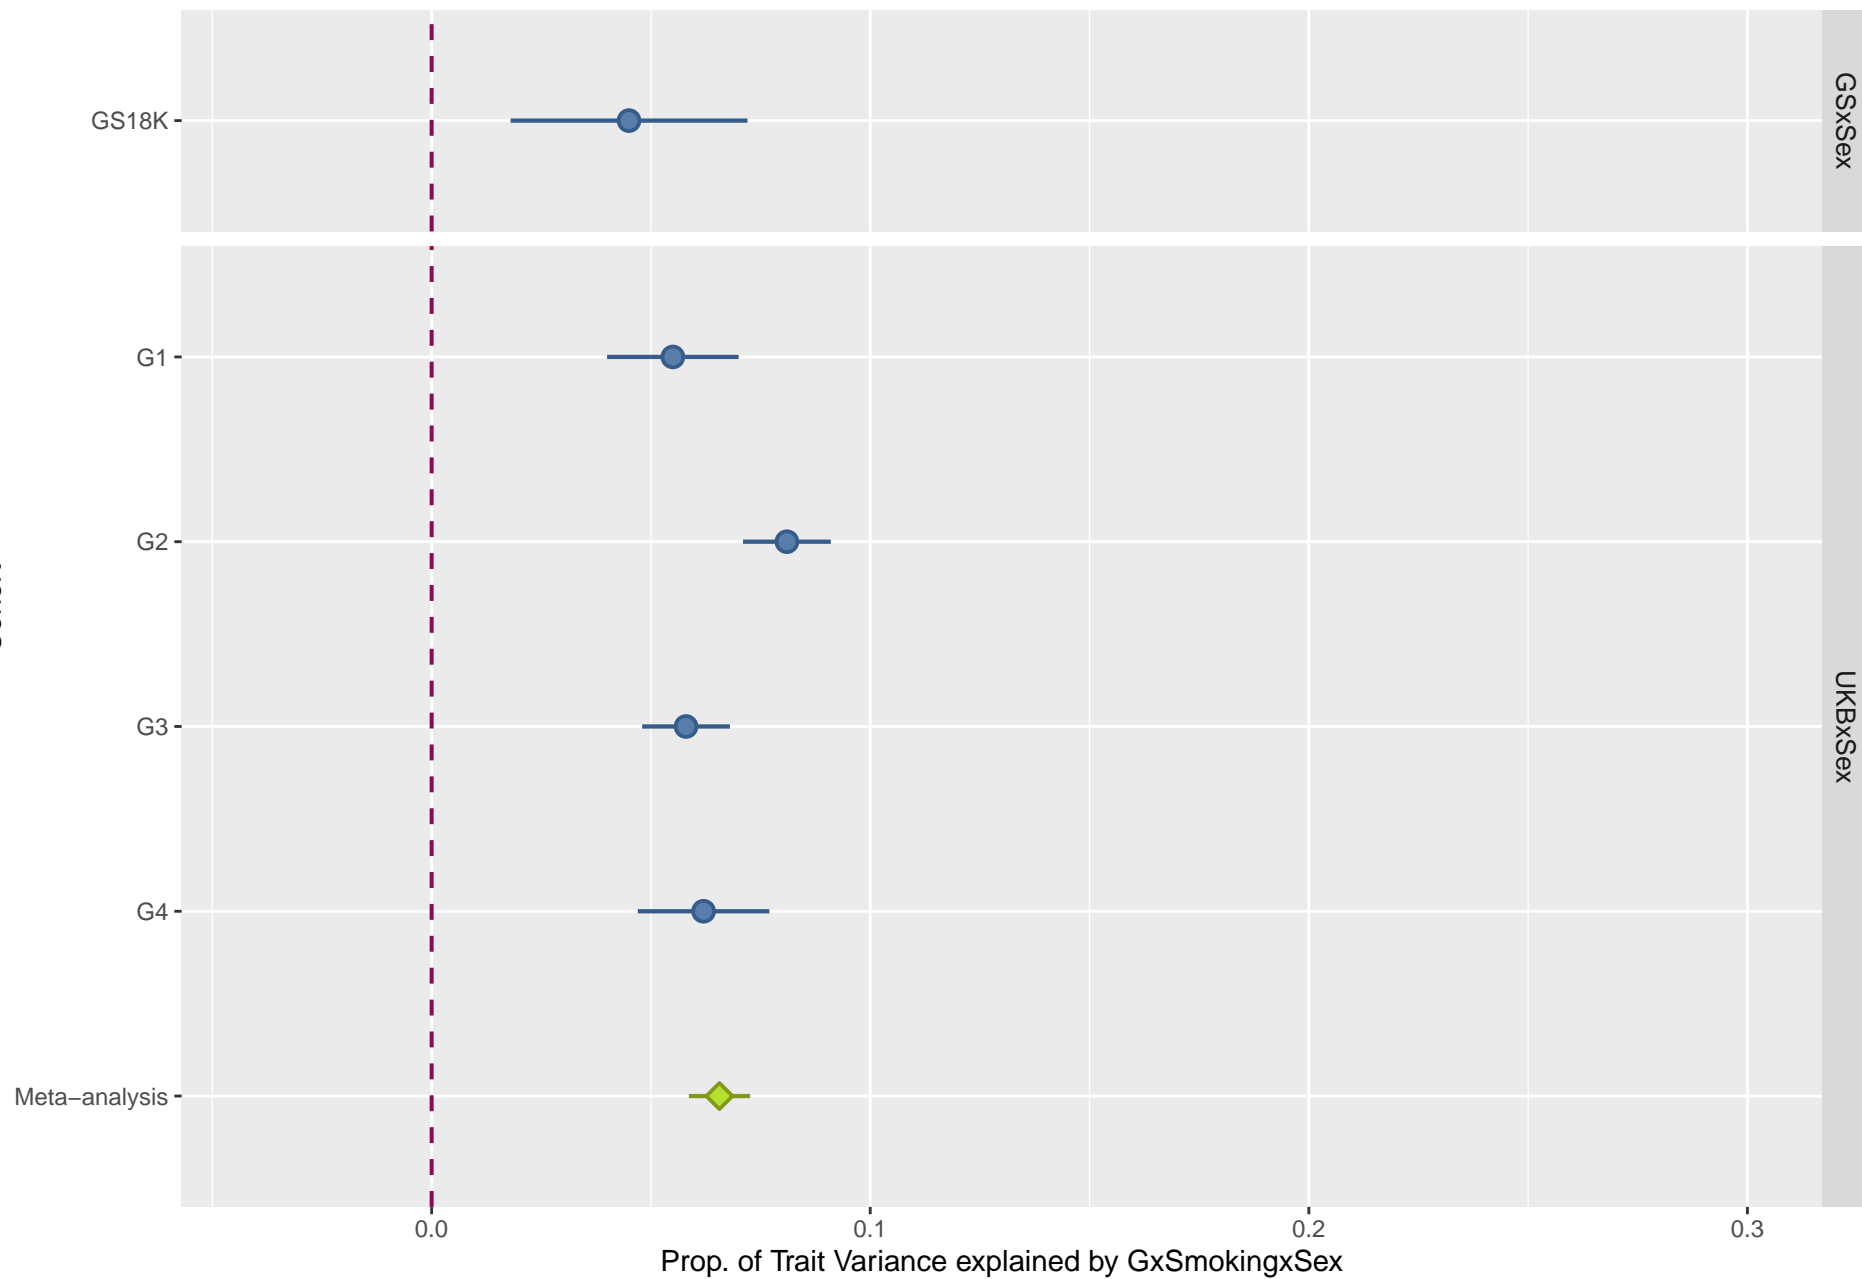

# Fat Percentage

Cohort

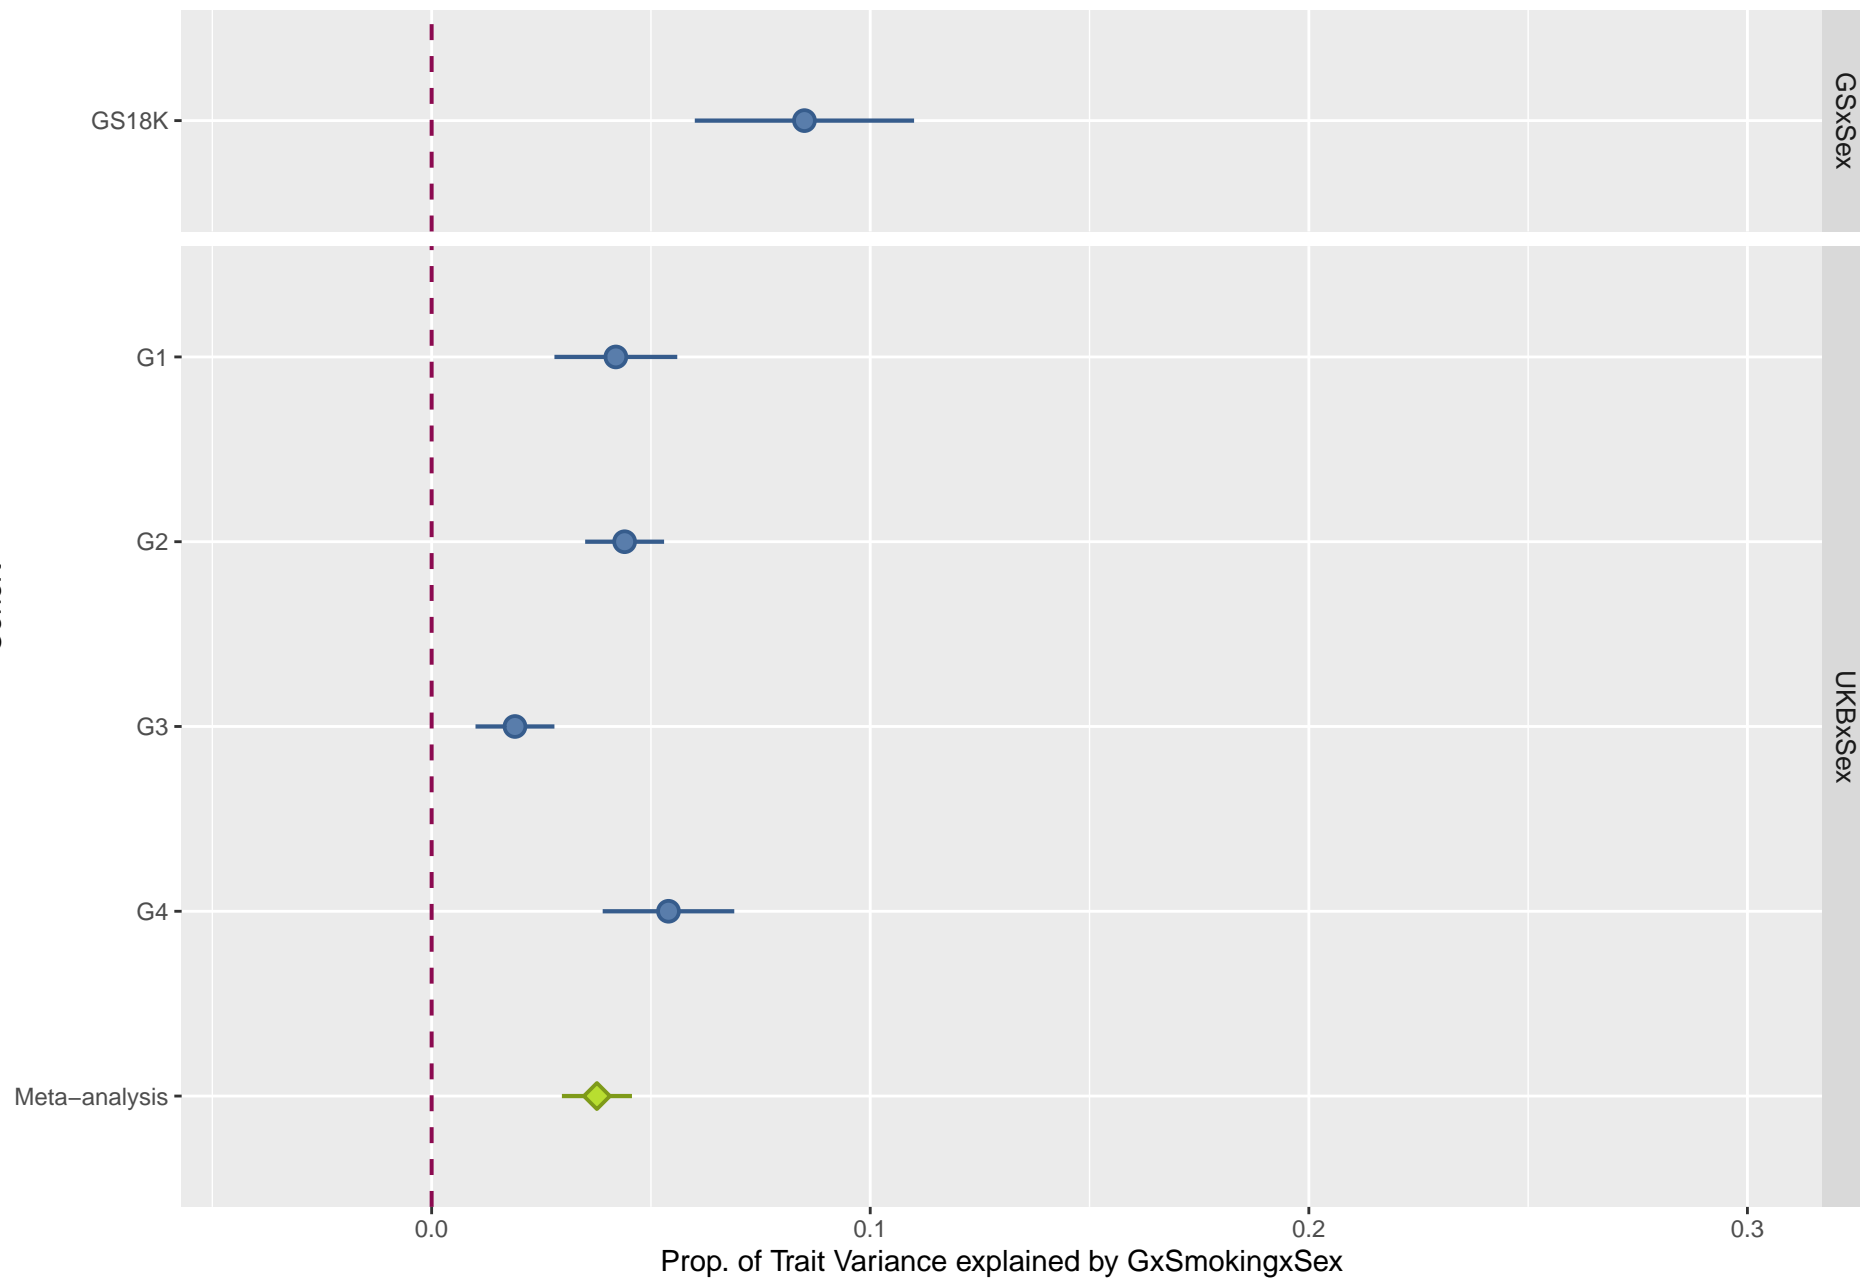

Supplement: S3 (10.1371/journal.pgen.1009750.s003) [file journal.pgen.1009750.s003]
